# Supplementary material for: Fabrication of a Dual-Drug-Loaded Smart Niosome-g-Chitosan Polymeric Platform for Lung Cancer Treatment
Source: MDPI journal article supplement (doi:10.3390/polym15020298), 2023-01-06
Supplement: s1 [file s1]

Supporting information

# Fabrication of a Dual-Drug-Loaded Smart Niosome-g-Chitosan Polymeric Platform for Lung Cancer Treatment

Atefeh Zarepour <sup>1</sup>, Abdurrahim Can Egil <sup>2</sup>, Melike Cokol Cakmak <sup>3</sup>, Monireh Esmaeili Rad <sup>2,3</sup>, Yuksel Cetin <sup>4</sup>, Seyma Aydinlik <sup>5</sup>, Gozde Ozaydin Ince <sup>2,3,6,\*</sup> and Ali Zarrabi <sup>1,\*</sup>

<sup>1</sup> Biomedical Engineering Department, Faculty of Engineering & Natural Sciences, Istinye University, Istanbul 34396, Turkiye

<sup>2</sup> Faculty of Engineering and Natural Sciences, Materials Science and Nano-Engineering Program, Sabanci University, 34956, Istanbul, Turkiye

<sup>3</sup> Sabanci University Nanotechnology Research and Application Center (SUNUM), Tuzla, Istanbul 34956, Turkiye

<sup>4</sup> TUBITAK Marmara Research Center, Life Sciences Medical Biotechnology, Gebze-Kocaeli, 41470 Turkiye

<sup>5</sup> TUBITAK Marmara Research Center, Life Sciences, Industrial Biotechnology, Gebze-Kocaeli, 41470 Turkiye

<sup>6</sup> Center of Excellence for Functional Surfaces and Interfaces (EFSUN), Sabanci University, Istanbul 34956, Turkiye

\* Correspondence: gozdeince@sabanciuniv.edu (G.O.I.), ali.zarrabi@istinye.edu.tr (A.Z.)

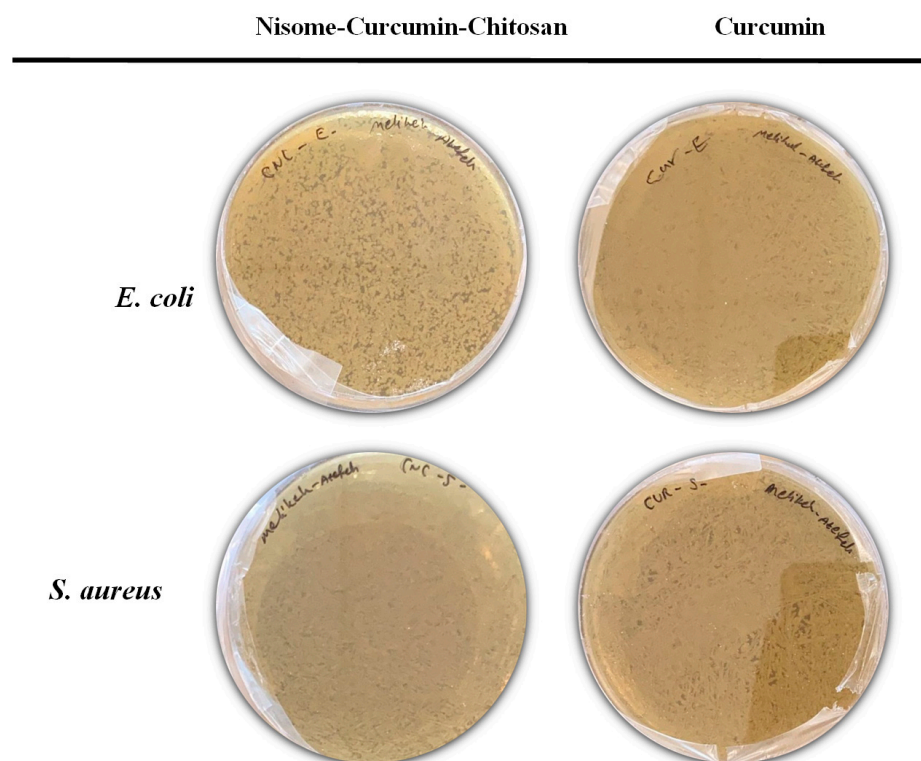

**Figure S1.** Effects of Curcumin loaded niosome-chitosan nanoparticles and free Curcumin on *E.coli* and *S.aureus*.
